# Supplementary material for: Early Assessment of Chemotherapy Response in Advanced Non-Small Cell Lung Cancer with Circulating Tumor DNA
Source: MDPI journal article supplement (doi:10.3390/cancers14102479), 2022-05-18
Supplement: s1 [file s1]

# Supplementary Materials: Early Assessment of Chemotherapy Response in Advanced Non-Small Cell Lung Cancer with Circulating Tumor DNA

Stephanie J. Yaung, Corinna Woestmann, Christine Ju, Xiaoju Max Ma, Sandeep Gattam, Yiyong Zhou, Liu Xi, Subrata Pal, Aarthi Balasubramanyam, Nalin Tikoo, Claus Peter Heussel, Michael Thomas, Mark Kriegsmann, Michael Meister, Marc A. Schneider, Felix J. Herth, Birgit Wehnl, Maximilian Diehn, Ash A. Alizadeh, John F. Palma and Thomas Muley

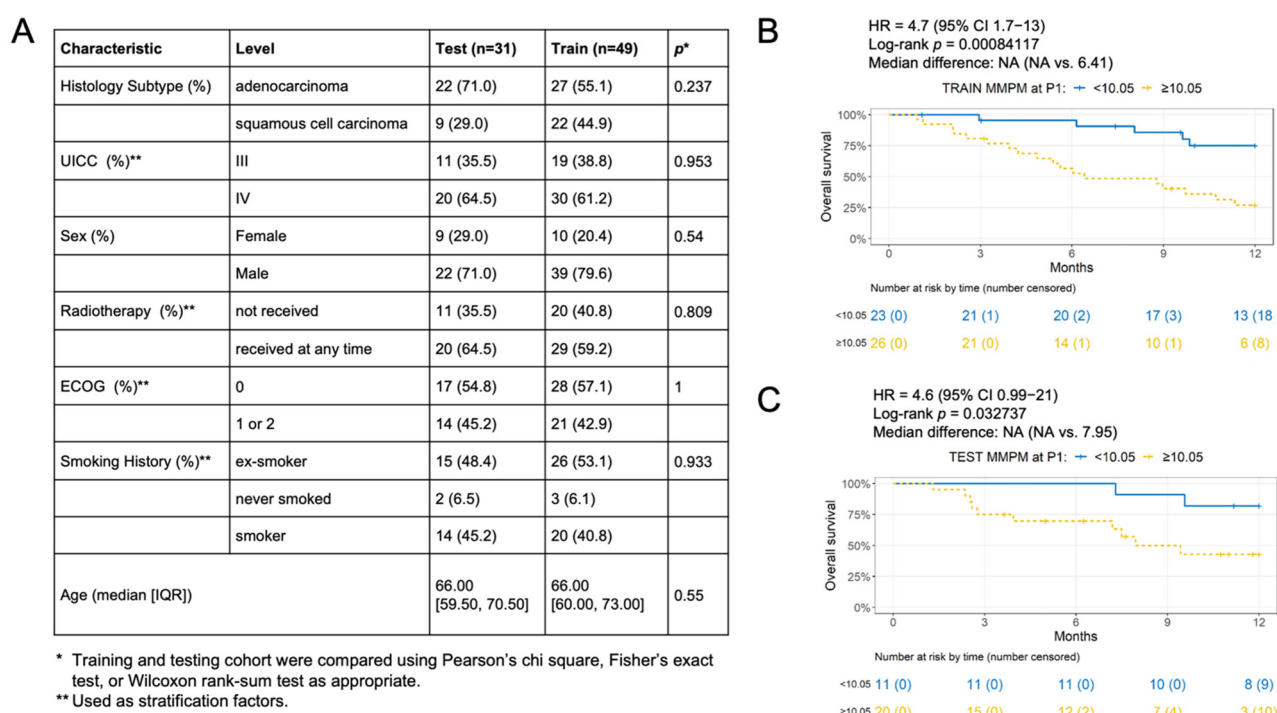

**Figure S1.** Association between overall survival and ctDNA level after one chemotherapy cycle. (A) Comparison of baseline characteristics between test and training cohorts. Overall survival for >10 vs. ≤10 mean mutant molecules per milliliter (MMPM) in the first available plasma after one cycle of chemotherapy in the training (B) and test (C) sets.

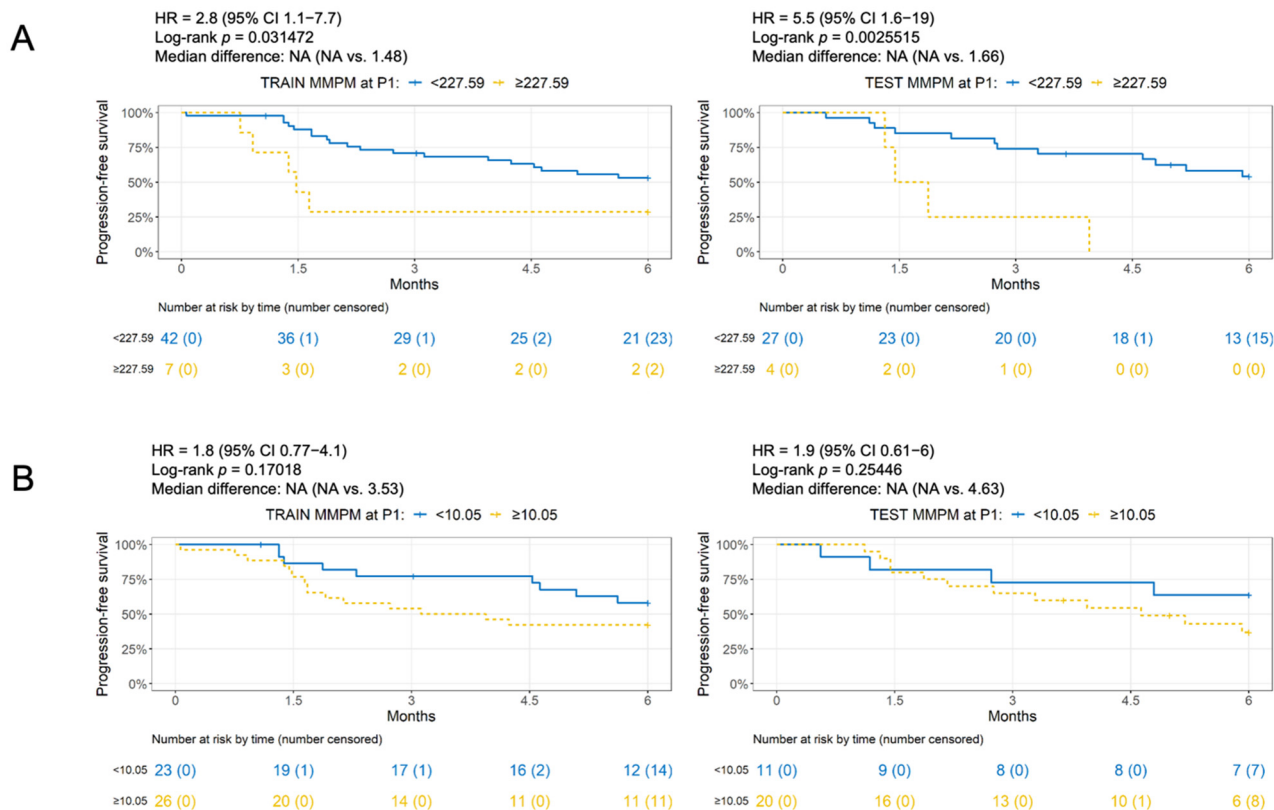

**Figure S2.** Association between progression-free survival and ctDNA level after one chemotherapy cycle. **(A)** Progression-free survival for  $>227$  vs.  $\leq 227$  mean mutant molecules per milliliter (MMPM) in the first available plasma after one cycle of chemotherapy in the training (**left**) and test (**right**) cohorts. **(B)** Progression-free survival for  $>10$  vs.  $\leq 10$  mean mutant molecules per milliliter (MMPM) in the first available plasma after one cycle of chemotherapy in the training (**left**) and test (**right**) cohorts.

**Table S1.** Summary of First Line Treatment Description.

| First Line Treatment                       | Overall<br><i>n</i> (%) |
|--------------------------------------------|-------------------------|
| Chemotherapy                               | 92 (100)                |
| Carboplatin or Cisplatin                   | 91 (99)                 |
| Platinum-based Vinorelbine                 | 49 (53)                 |
| Platinum-based Pemetrexed                  | 27 (29)                 |
| Platinum-based Gemcitabine                 | 6 (7)                   |
| Platinum-based Paclitaxel                  | 3 (3)                   |
| Platinum-based Abraxane                    | 2 (2)                   |
| Platinum-based Paclitaxel and Abraxane     | 2 (2)                   |
| Platinum-based Vinorelbine and Pemetrexed  | 1 (1)                   |
| Platinum-based Vinorelbine and Vincristine | 1 (1)                   |
| Platinum-free Pemetrexed                   | 1 (1)                   |

**Table S2.** Most Frequently Mutated Genes in Baseline Plasma ( $N = 92$ ).

| Gene             | N (%)   |
|------------------|---------|
| <i>TP53</i>      | 52 (57) |
| <i>NPAP1</i>     | 29 (32) |
| <i>KRAS</i>      | 27 (29) |
| <i>EGFR</i>      | 18 (20) |
| <i>KIT</i>       | 17 (18) |
| <i>APC</i>       | 16 (17) |
| <i>BRCA2</i>     | 16 (17) |
| <i>FAM135B</i>   | 16 (17) |
| <i>POM121L12</i> | 15 (16) |
| <i>SLC8A1</i>    | 15 (16) |
| <i>USP29</i>     | 15 (16) |
| <i>CSMD3</i>     | 14 (15) |
| <i>FBXL7</i>     | 14 (15) |
| <i>CHRM2</i>     | 13 (14) |
| <i>KIAA1211</i>  | 13 (14) |
| <i>LRRC7</i>     | 13 (14) |
| <i>MET</i>       | 13 (14) |
| <i>ALK</i>       | 12 (13) |
| <i>BRCA1</i>     | 12 (13) |
| <i>ERBB2</i>     | 12 (13) |
| <i>KEAP1</i>     | 12 (13) |
| <i>LRRTM1</i>    | 12 (13) |
| <i>LRRTM4</i>    | 12 (13) |
| <i>BRINP2</i>    | 11 (12) |
| <i>DDI1</i>      | 11 (12) |
| <i>KPRP</i>      | 11 (12) |
| <i>SLITRK5</i>   | 11 (12) |
| <i>ZNF521</i>    | 11 (12) |
| <i>BCHE</i>      | 10 (11) |
| <i>BRAF</i>      | 10 (11) |
| <i>BRINP3</i>    | 10 (11) |
| <i>MKRN3</i>     | 10 (11) |
| <i>NLRP3</i>     | 10 (11) |
| <i>PDGFRA</i>    | 10 (11) |
| <i>RET</i>       | 10 (11) |
| <i>SLITRK4</i>   | 10 (11) |

Note: Genes are only counted once per subject regardless of specific mutation. Mutations include both synonymous and nonsynonymous single nucleotide variants, insertions and deletions.

**Table S3.** Hazard Ratios and Confidence Intervals for Potential Adjustment Variables.

| Analysis for Full Population ( $n = 92$ ) |                  | PFS           |                  | OS            |  |
|-------------------------------------------|------------------|---------------|------------------|---------------|--|
| Variable                                  | HR (95% CI)      | logrank $p^*$ | HR (95% CI)      | logrank $p^*$ |  |
| <b>Histology Subtype</b>                  |                  | 0.17          |                  | 0.24          |  |
| Squamous cell carcinoma                   | 0.65 (0.35–1.20) |               | 0.67 (0.34–1.32) |               |  |
| Adenocarcinoma                            | Reference        |               | Reference        |               |  |
| <b>Age</b>                                | 1.00 (0.97–1.03) | 0.91          | 1.02 (0.98–1.06) | 0.33          |  |
| <b>Sex</b>                                |                  | 0.14          |                  | 0.30          |  |
| Male                                      | 0.62 (0.33–1.17) |               | 0.70 (0.35–1.38) |               |  |
| Female                                    | Reference        |               | Reference        |               |  |
| <b>Smoking History</b>                    |                  | 0.58          |                  | <b>0.090</b>  |  |
| Never Smoked                              | 1.41 (0.33–6.00) |               | 1.99 (0.45–8.74) |               |  |
| Smoker                                    | 1.36 (0.75–2.47) |               | 2.05 (1.05–3.98) |               |  |

|                                       |                  |                  |               |
|---------------------------------------|------------------|------------------|---------------|
| Ex-Smoker                             | Reference        | Reference        |               |
| <b>ECOG</b>                           |                  |                  | <b>0.0053</b> |
| 1 or 2                                | 1.12 (0.62–2.04) | 2.43(1.28–4.62)  |               |
| 0                                     | Reference        | Reference        |               |
| <b>UICC</b>                           |                  |                  | <b>0.0061</b> |
| IV                                    | 2.40 (1.26–4.59) | 1.67 (0.84–3.32) |               |
| III                                   | Reference        | Reference        |               |
| <b>Radiotherapy (any time)</b>        |                  |                  | <b>0.088</b>  |
| Received                              | 0.72 (0.40–1.30) | 0.58 (0.30–1.09) |               |
| Not received                          | Reference        | Reference        |               |
| <b>Radiotherapy (within 365 days)</b> |                  |                  | <b>0.14</b>   |
| Received                              | 0.77 (0.43–1.39) | 0.62 (0.33–1.17) |               |
| Not received                          | Reference        | Reference        |               |
| <b>Radiotherapy (within 182 days)</b> |                  |                  | <b>0.41</b>   |
| Received                              | 0.73 (0.40–1.30) | 0.76 (0.40–1.45) |               |
| Not received                          | Reference        | Reference        |               |

Note: Abbreviations: PFS, progression free survival; OS, overall survival. \*Global *p*-values presented for categorical variables with more than 2 levels. Unadjusted Cox proportional hazards models were performed for each potential adjustment variable. *p*-values in bold are below the 0.1 threshold used to select variables for inclusion in multivariate Cox proportional hazards models.
